# Supplementary material for: Klymollins T–X, Bioactive Eunicellin-Based Diterpenoids from the Soft Coral Klyxum molle
Source: MDPI journal article supplement (doi:10.3390/md12053060), 2014-05-22
Supplement: s1 [file s1]

## Supplementary Information

Figure S1.  $^1\text{H}$  NMR spectrum of **1** in  $\text{C}_6\text{D}_6$  at 500 MHz.

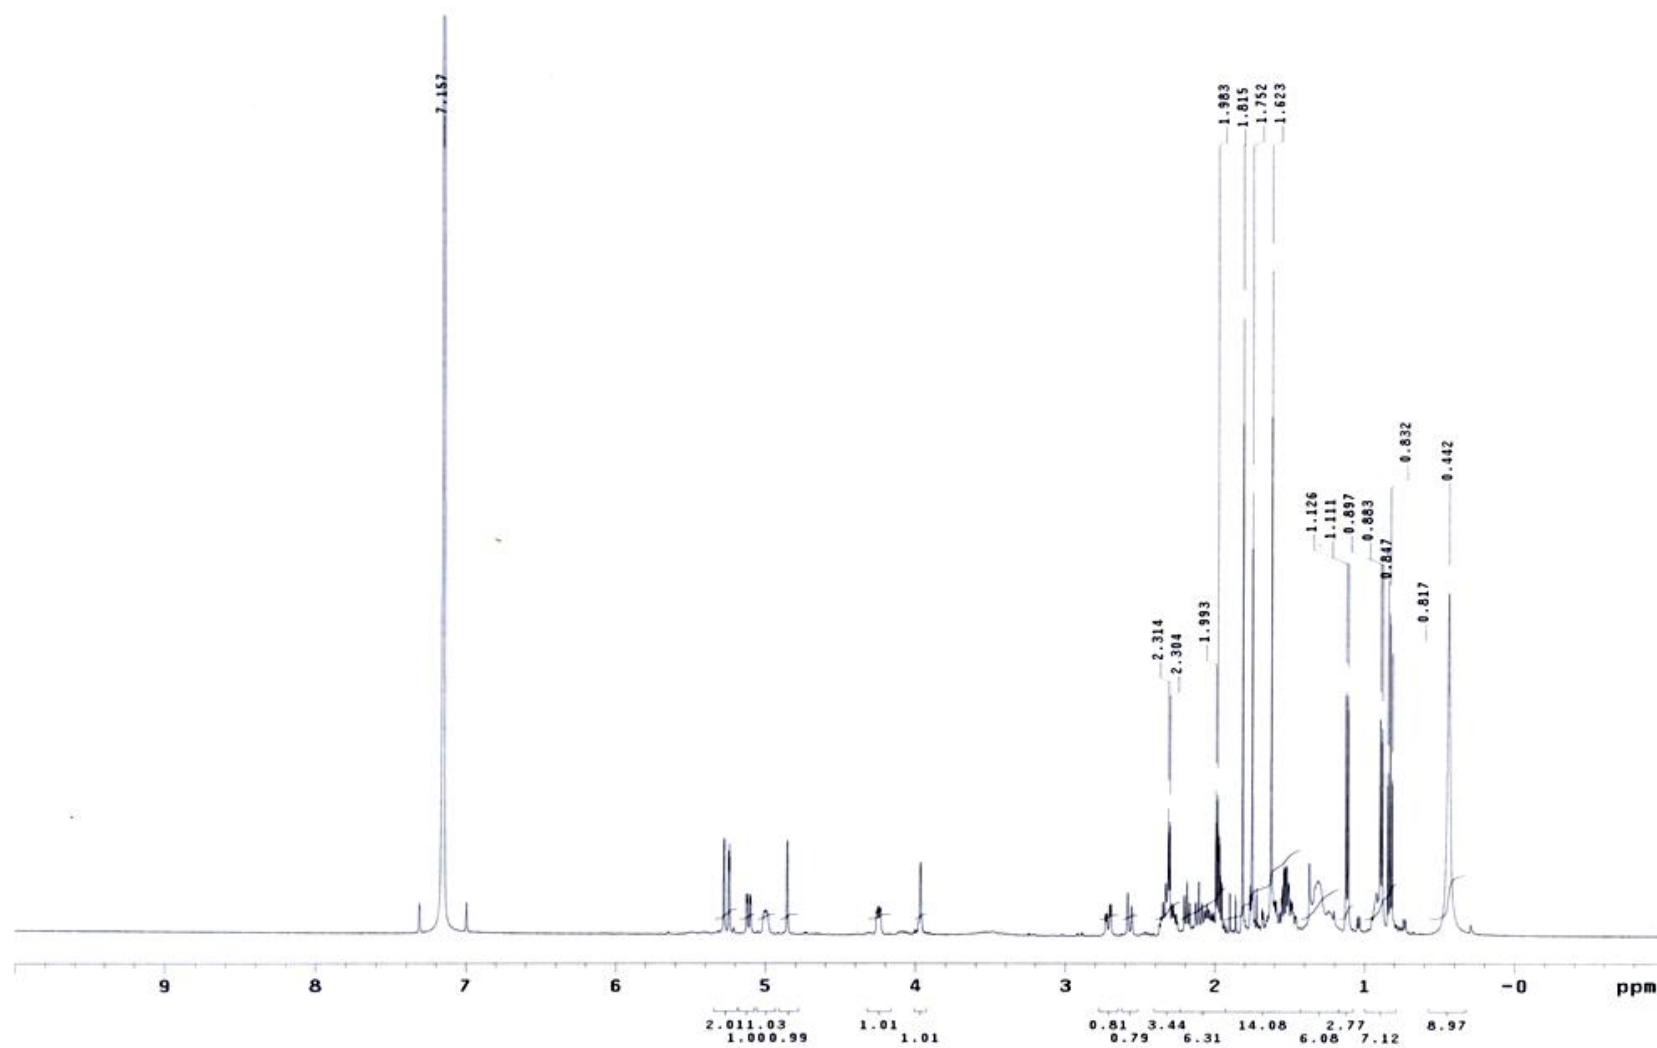

**Figure S2.**  $^{13}\text{C}$  NMR spectrum of **1** in  $\text{C}_6\text{D}_6$  at 125 MHz.

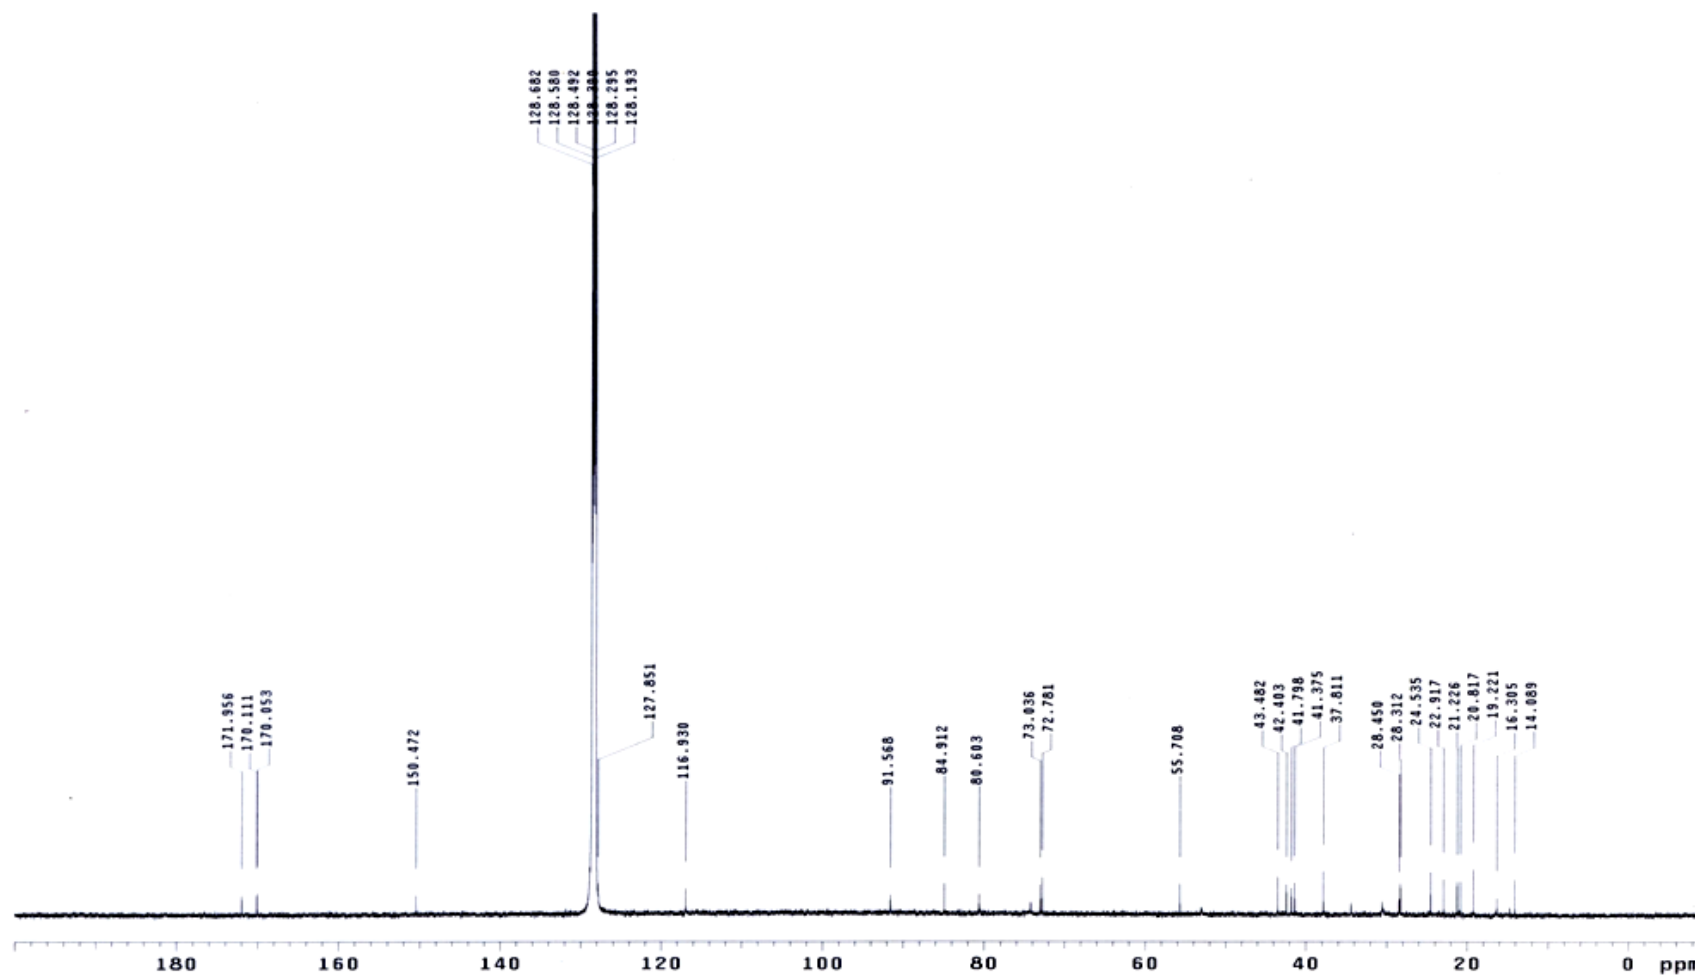

**Figure S3.** HRESIMS spectrum of **1**.

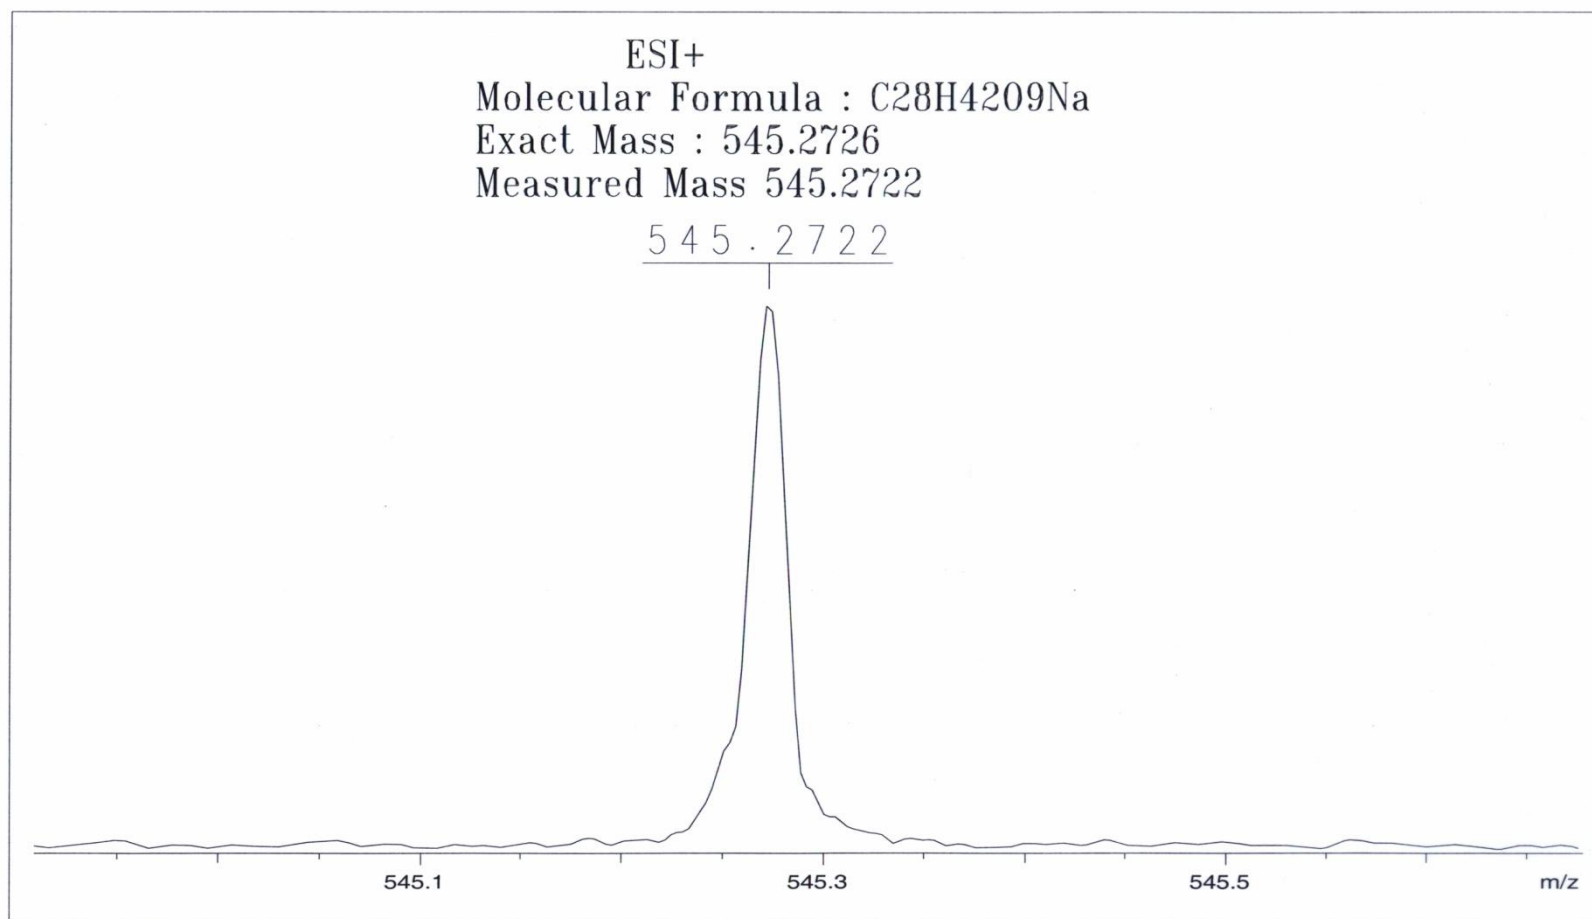

/d=/Data/yl/HFJ22/1/pdata/1 Administrator Fri May 28 15:39:37 2010

**Figure S4.**  $^1\text{H}$  NMR spectrum of **2** in  $\text{CDCl}_3$  at 400 MHz.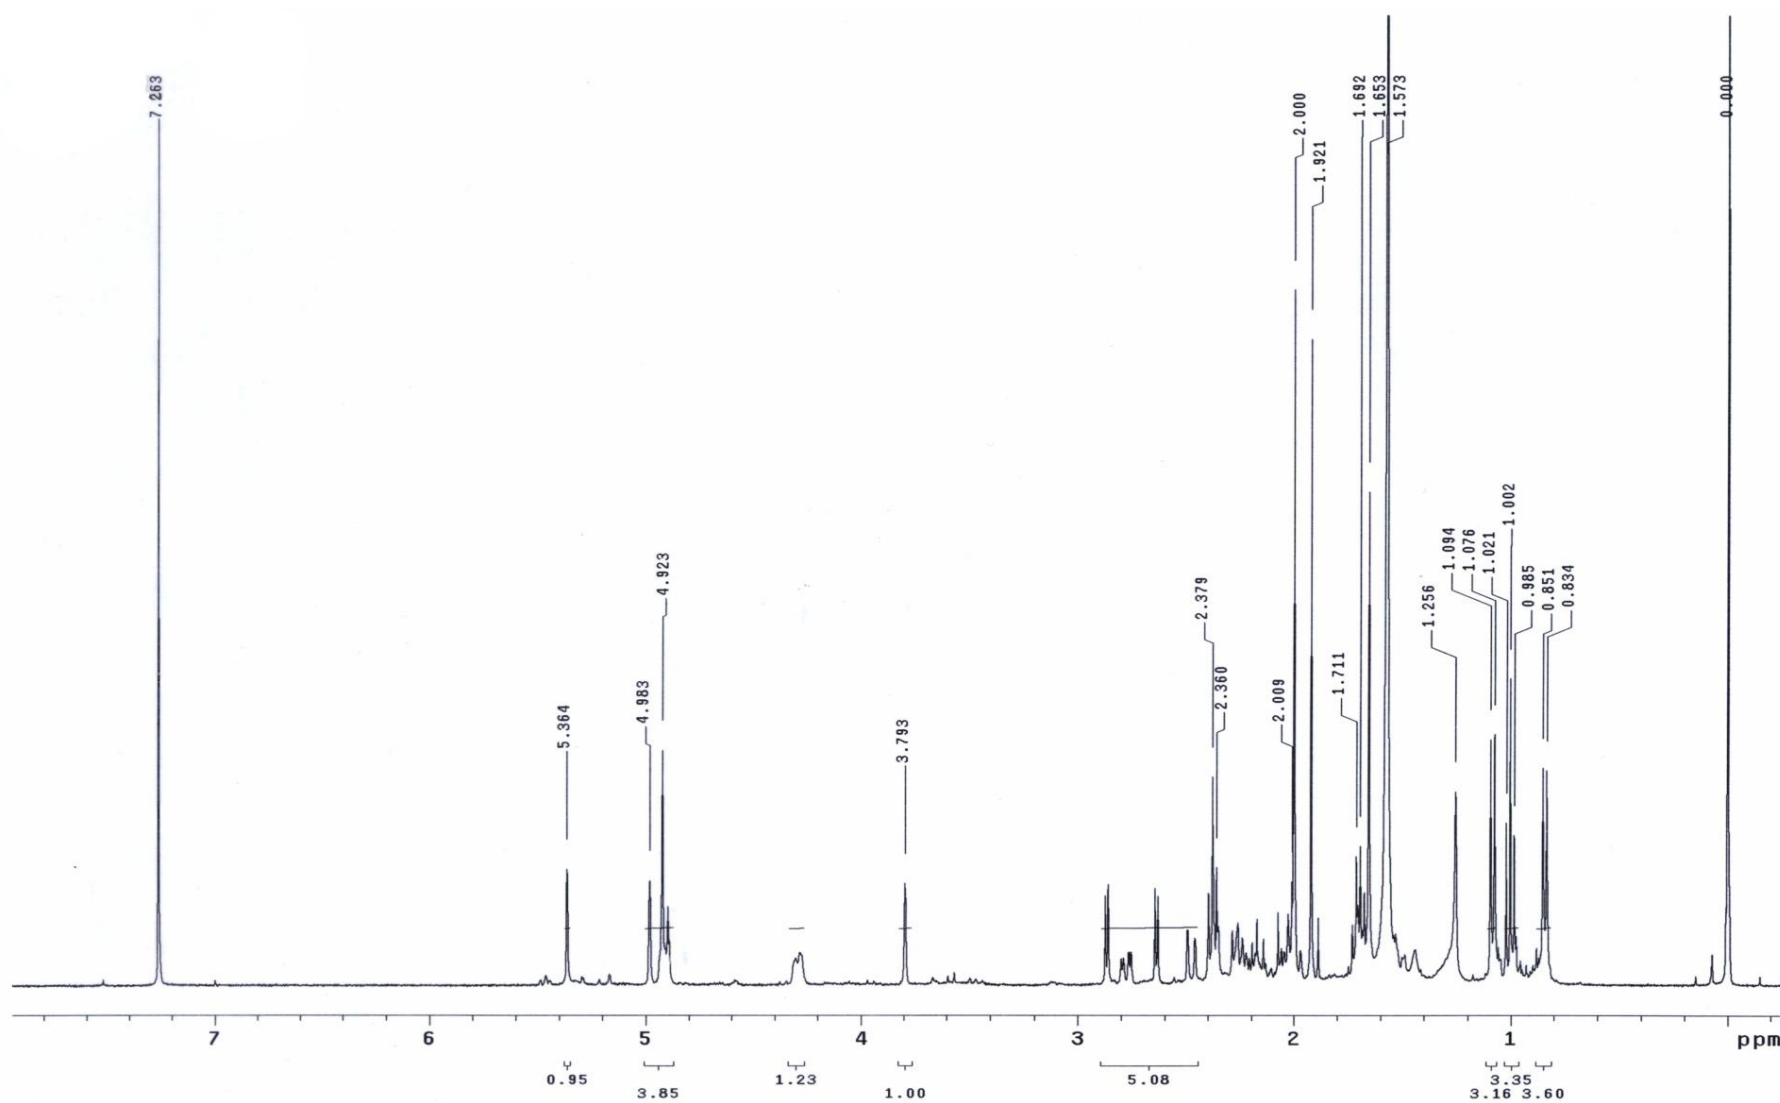

**Figure S5.**  $^{13}\text{C}$  NMR spectrum of **2** in  $\text{CDCl}_3$  at 100 MHz.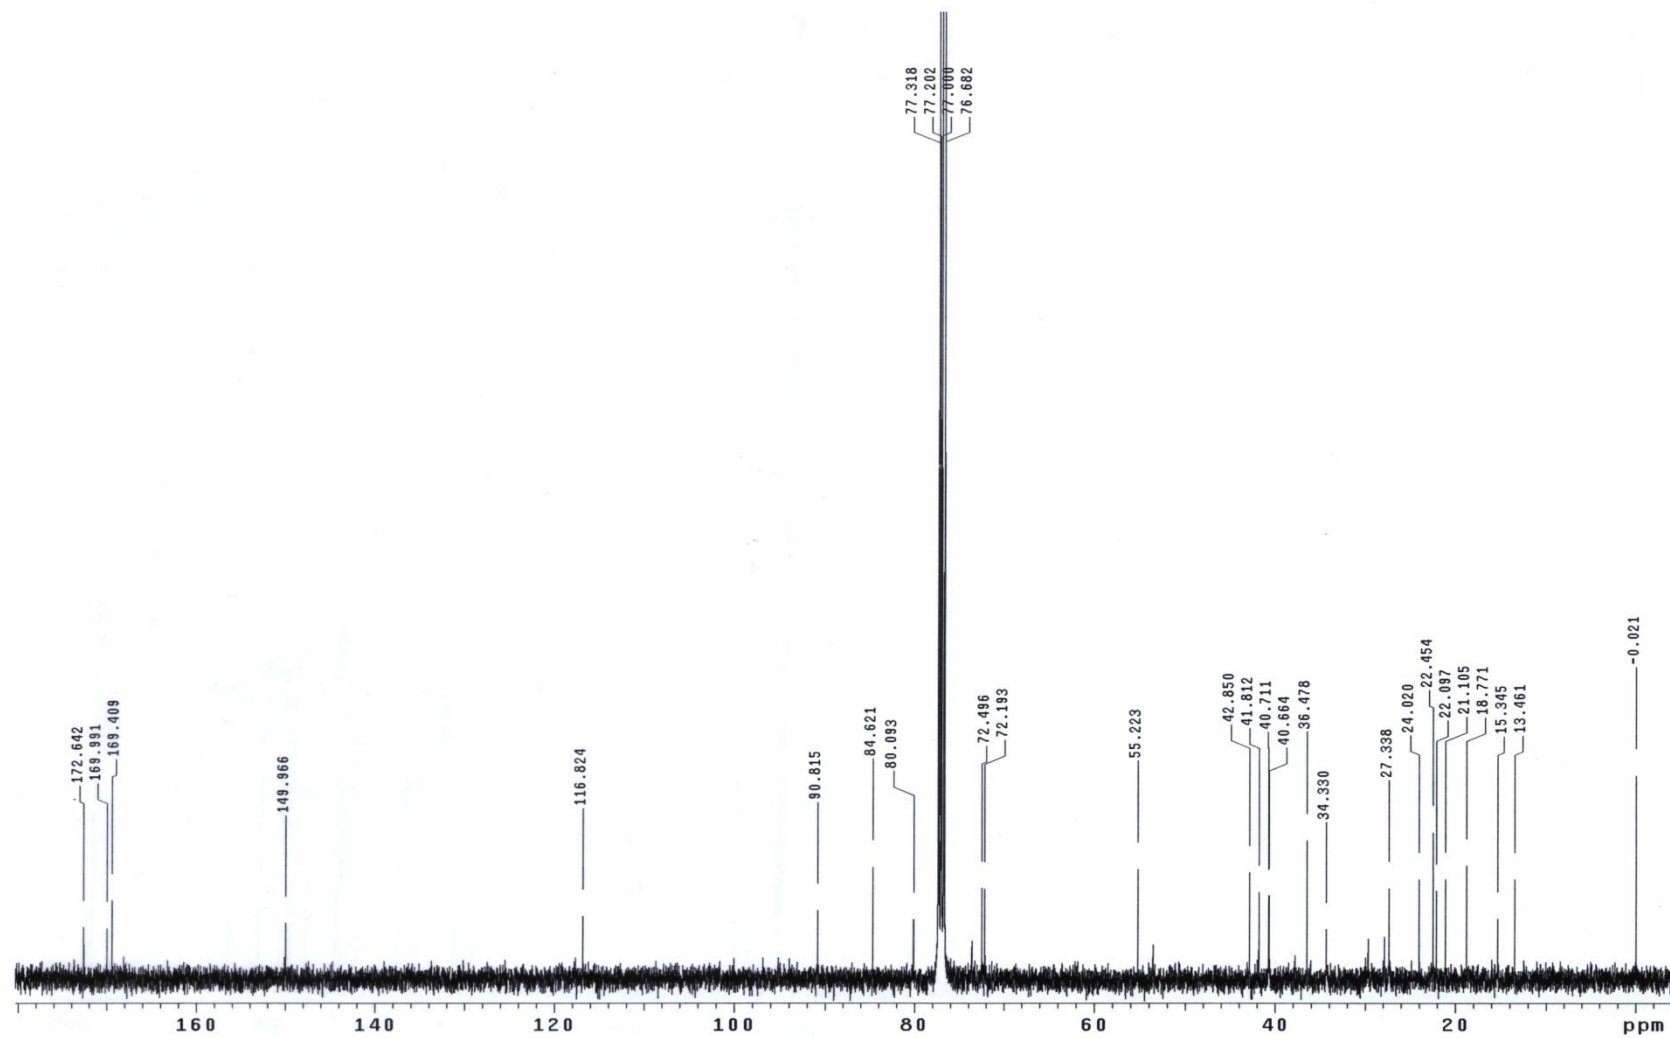

**Figure S6.** HRESIMS spectrum of **2**.

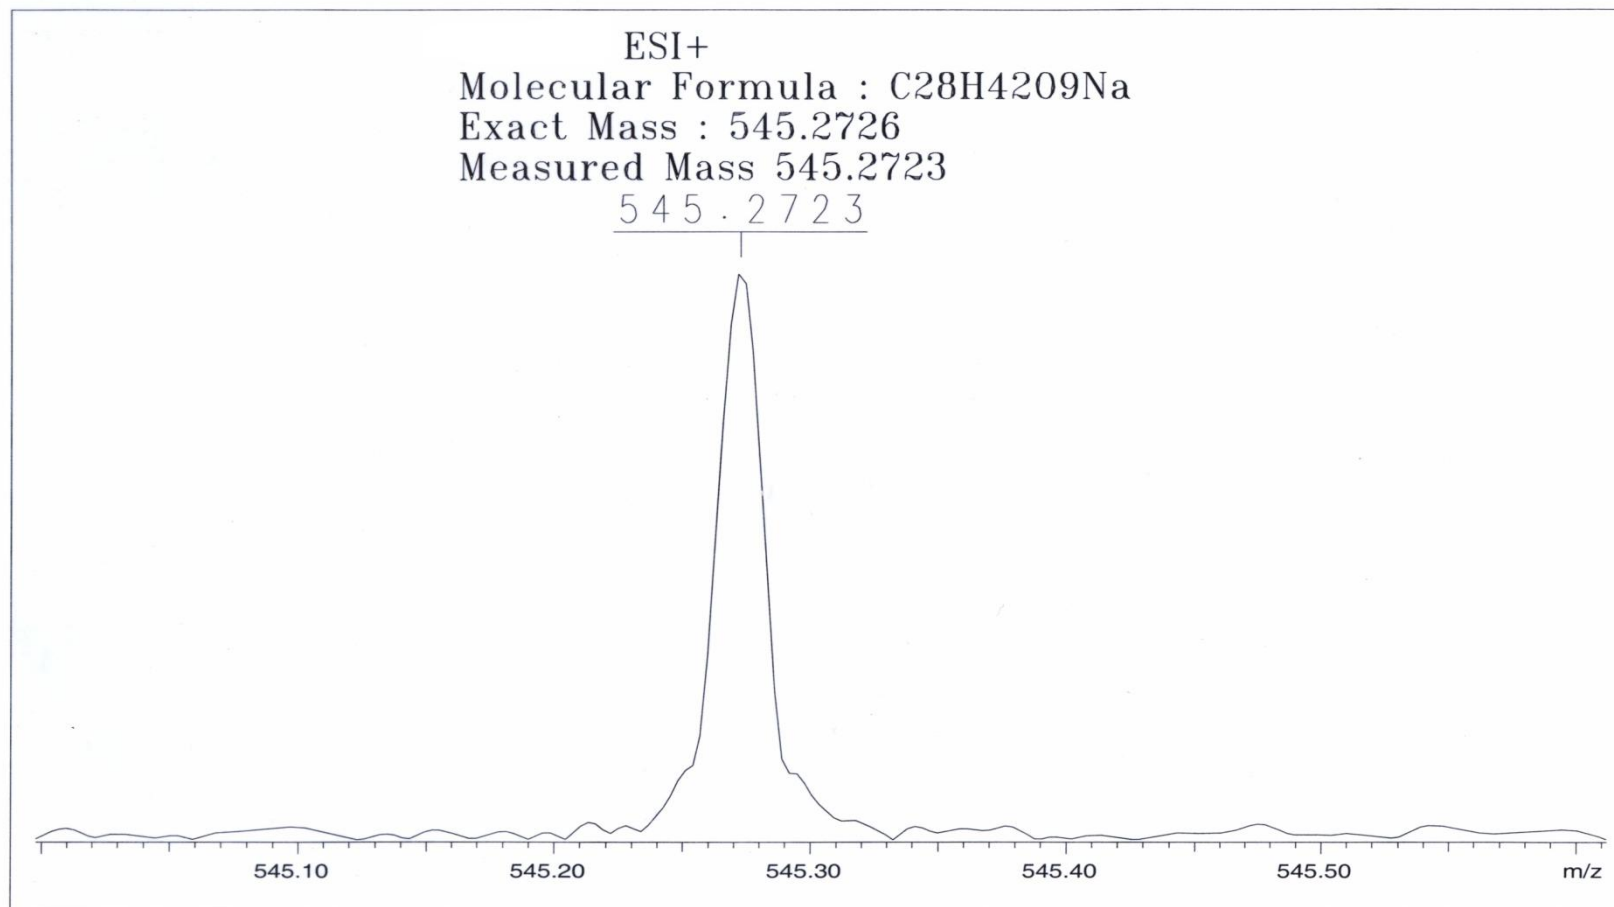

/d=/Data/yy/HFJ23/1/pdata/1 Administrator Fri May 28 15:46:02 2010

**Figure S7.**  $^1\text{H}$  NMR spectrum of **3** in  $\text{CDCl}_3$  at 400 MHz.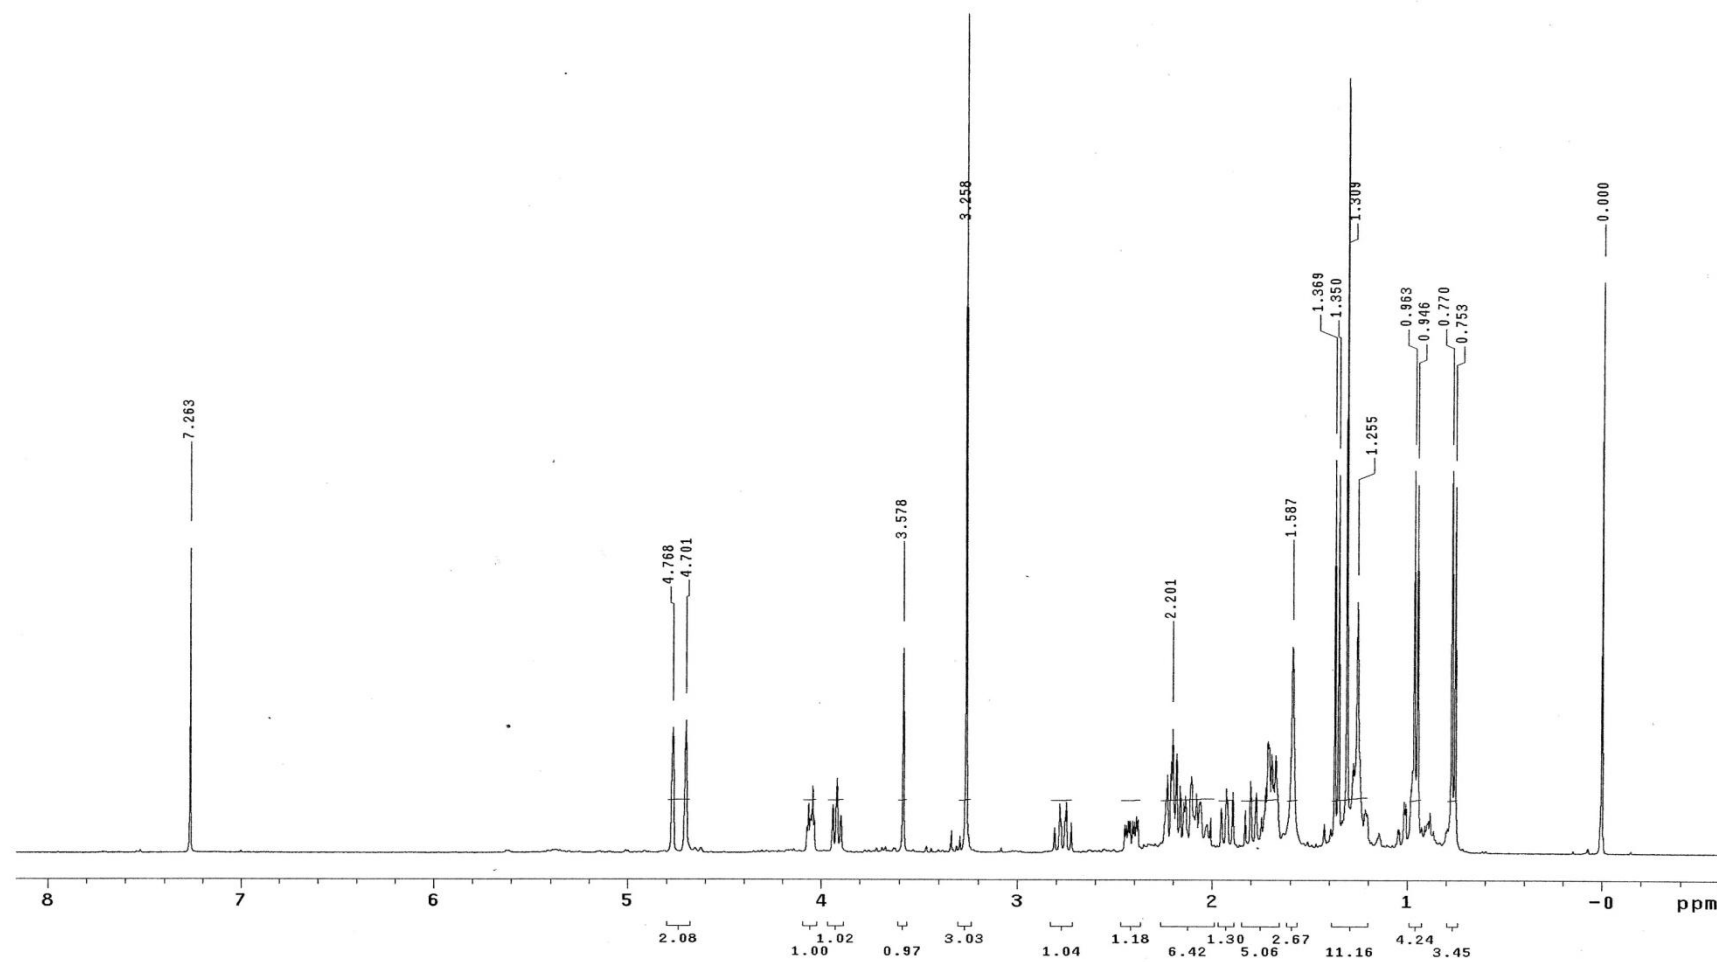

**Figure S8.**  $^{13}\text{C}$  NMR spectrum of **3** in  $\text{CDCl}_3$  at 100 MHz.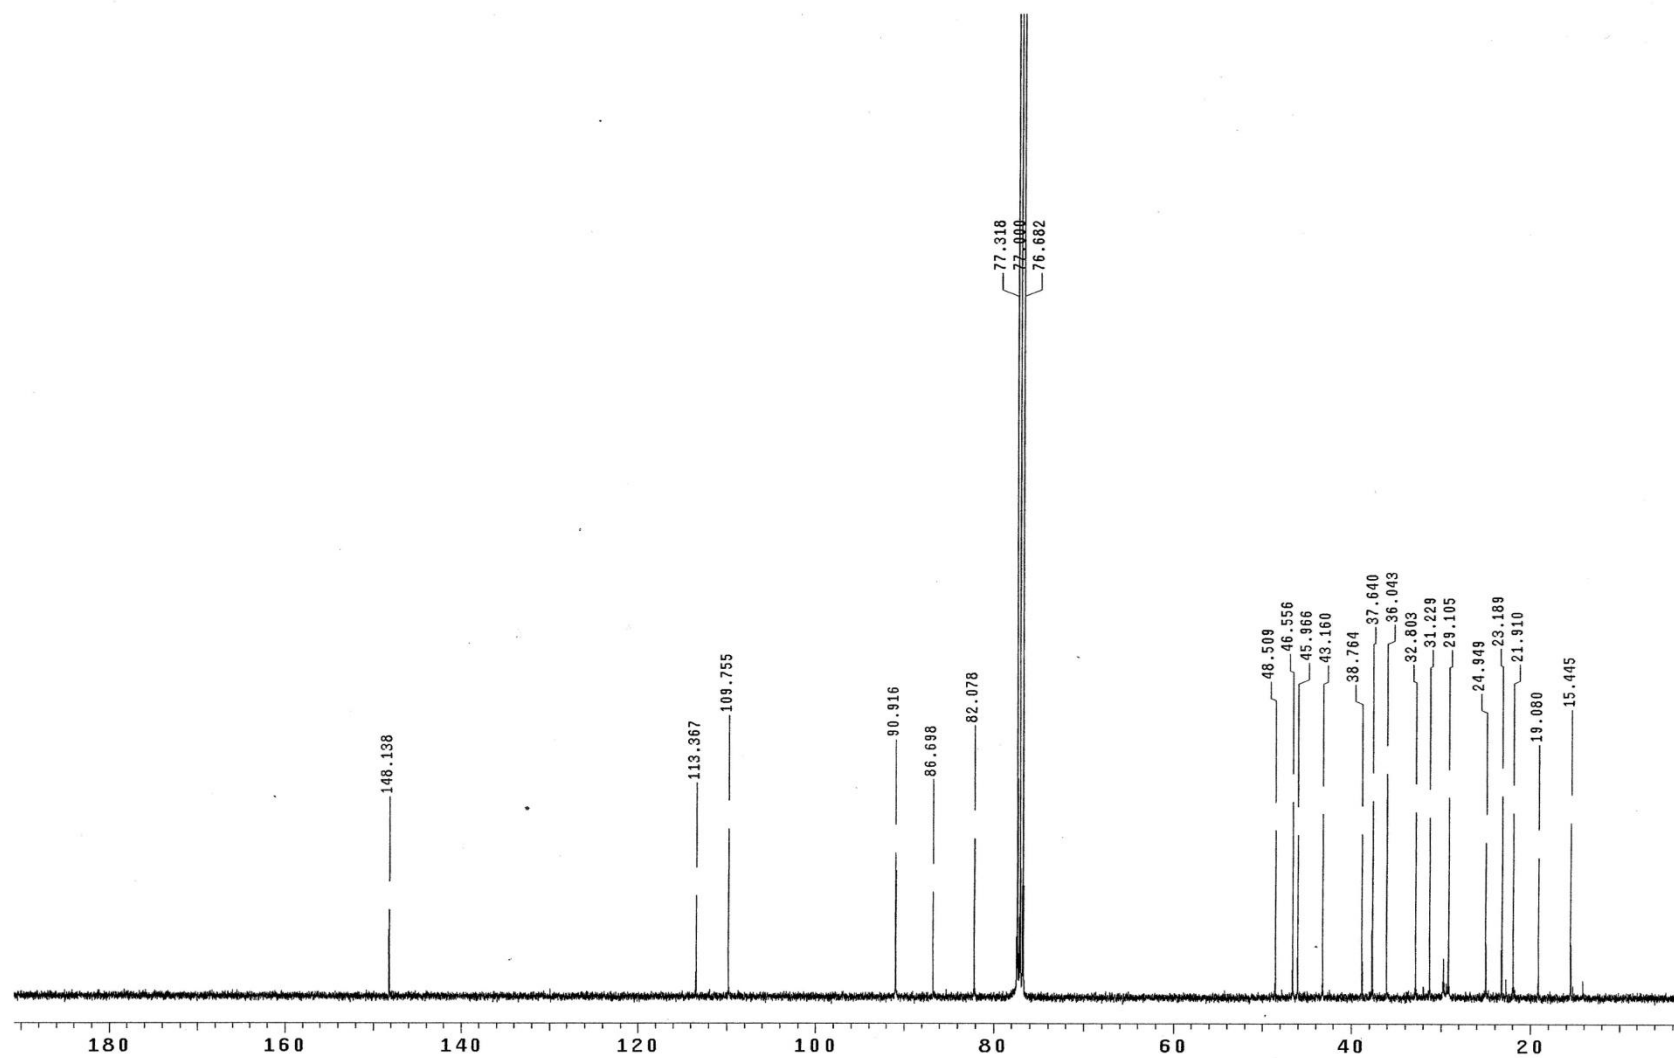



**Figure S9.** HRESIMS spectrum of **3**.

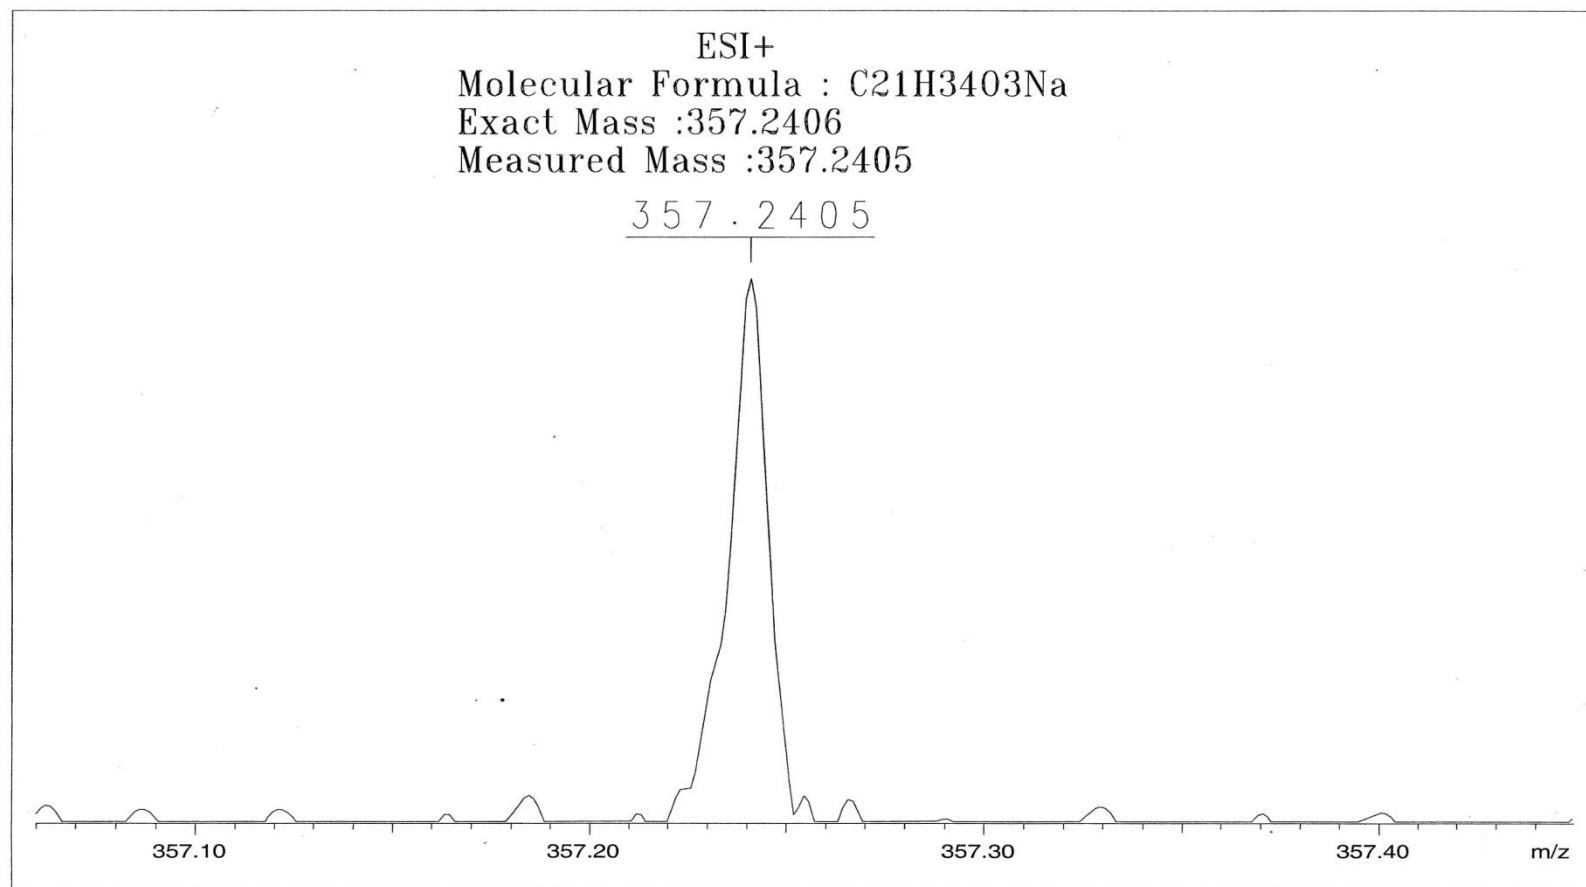

/d=/Data/yu/fj18261/1/pdata/1 Administrator Fri May 20 13:34:09 2011

**Figure S10.**  $^1\text{H}$  NMR spectrum of **4** in  $\text{CDCl}_3$  at 400 MHz.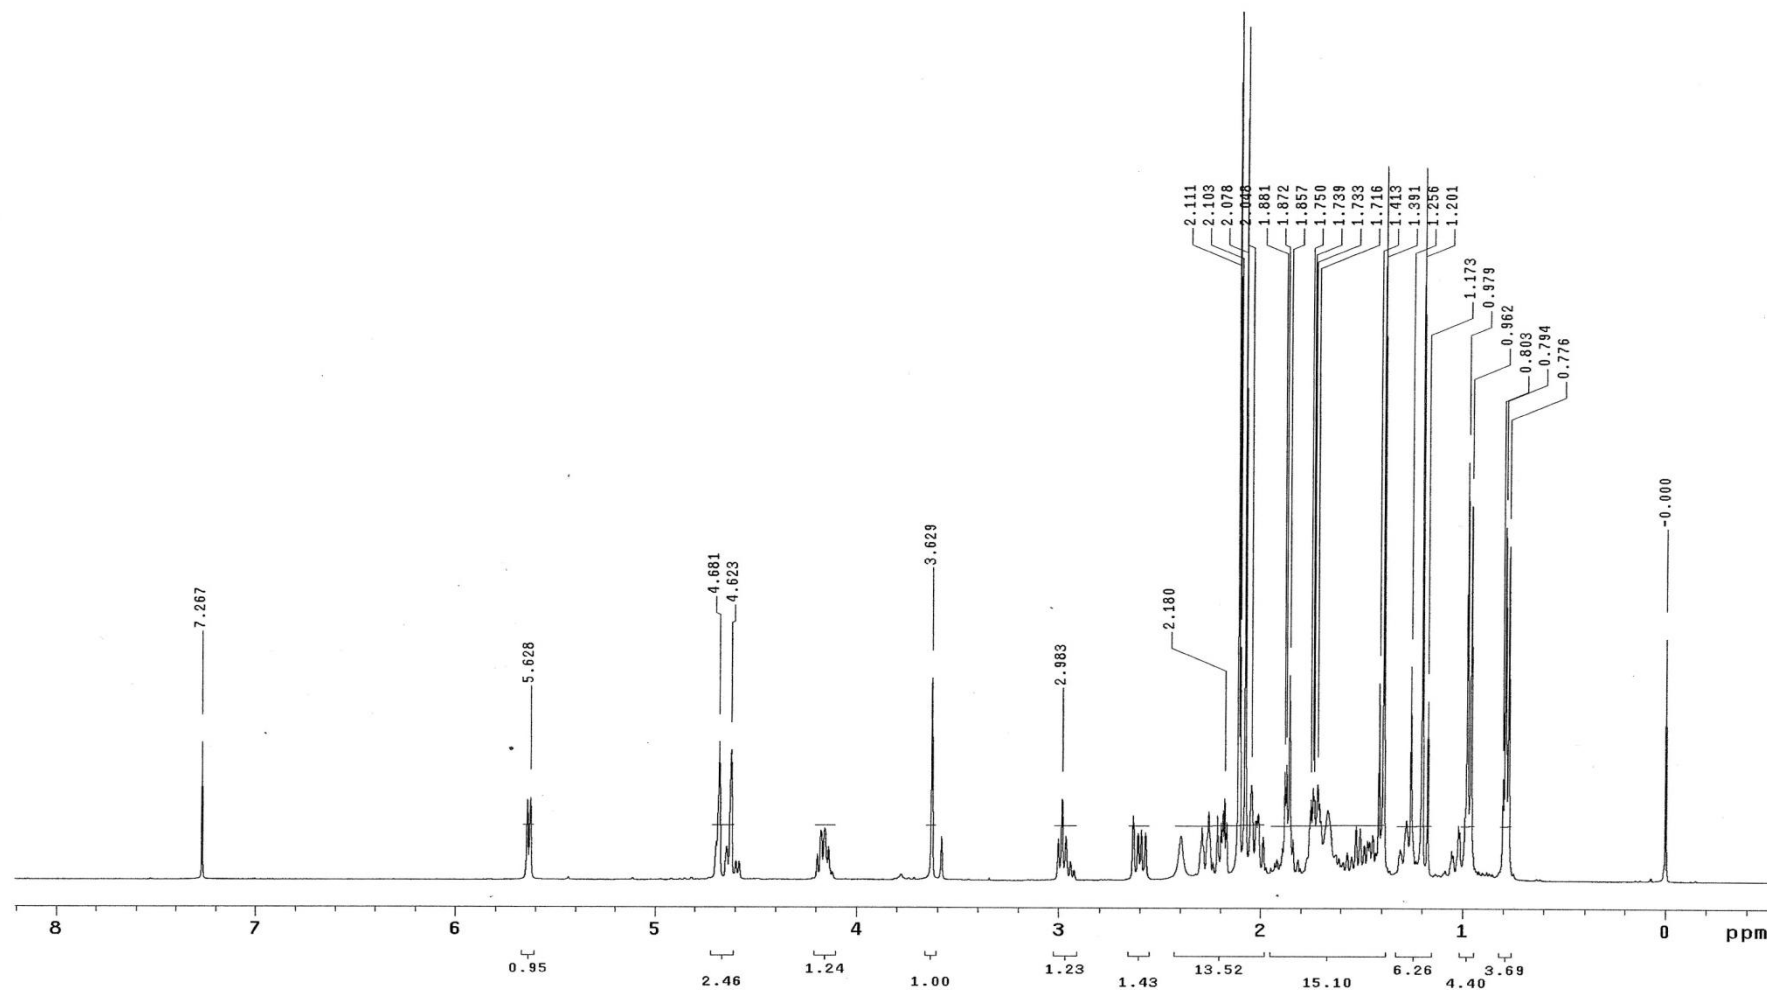

**Figure S11.**  $^{13}\text{C}$  NMR spectrum of **4** in  $\text{CDCl}_3$  at 100 MHz.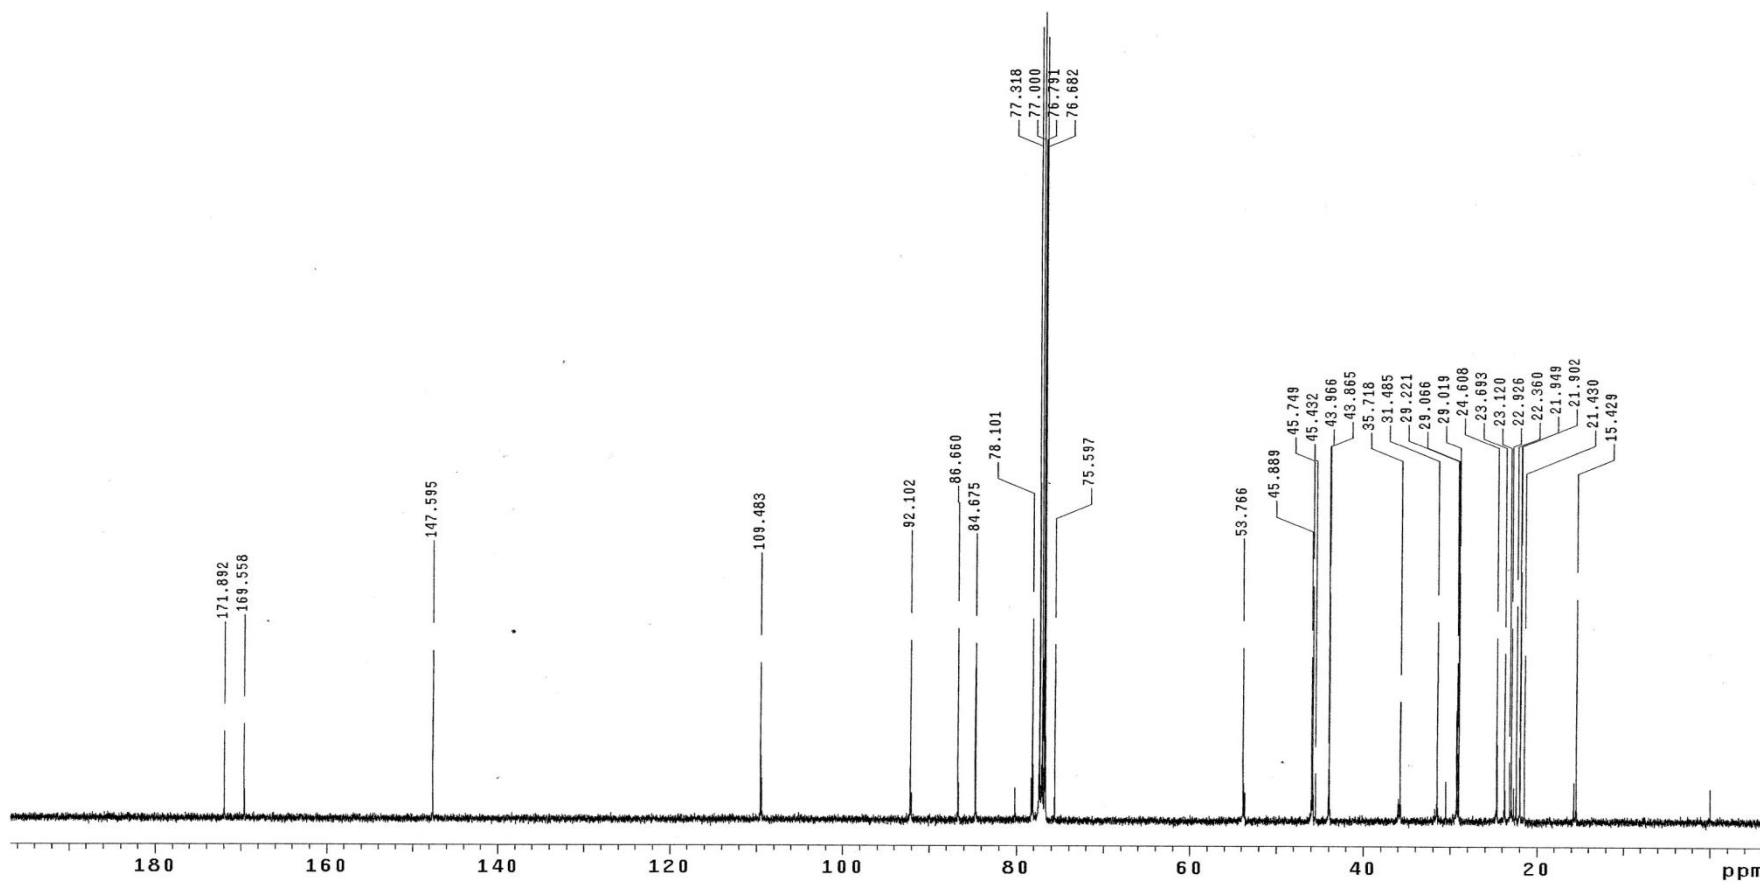

**Figure S12.** HRESIMS spectrum of **4**.

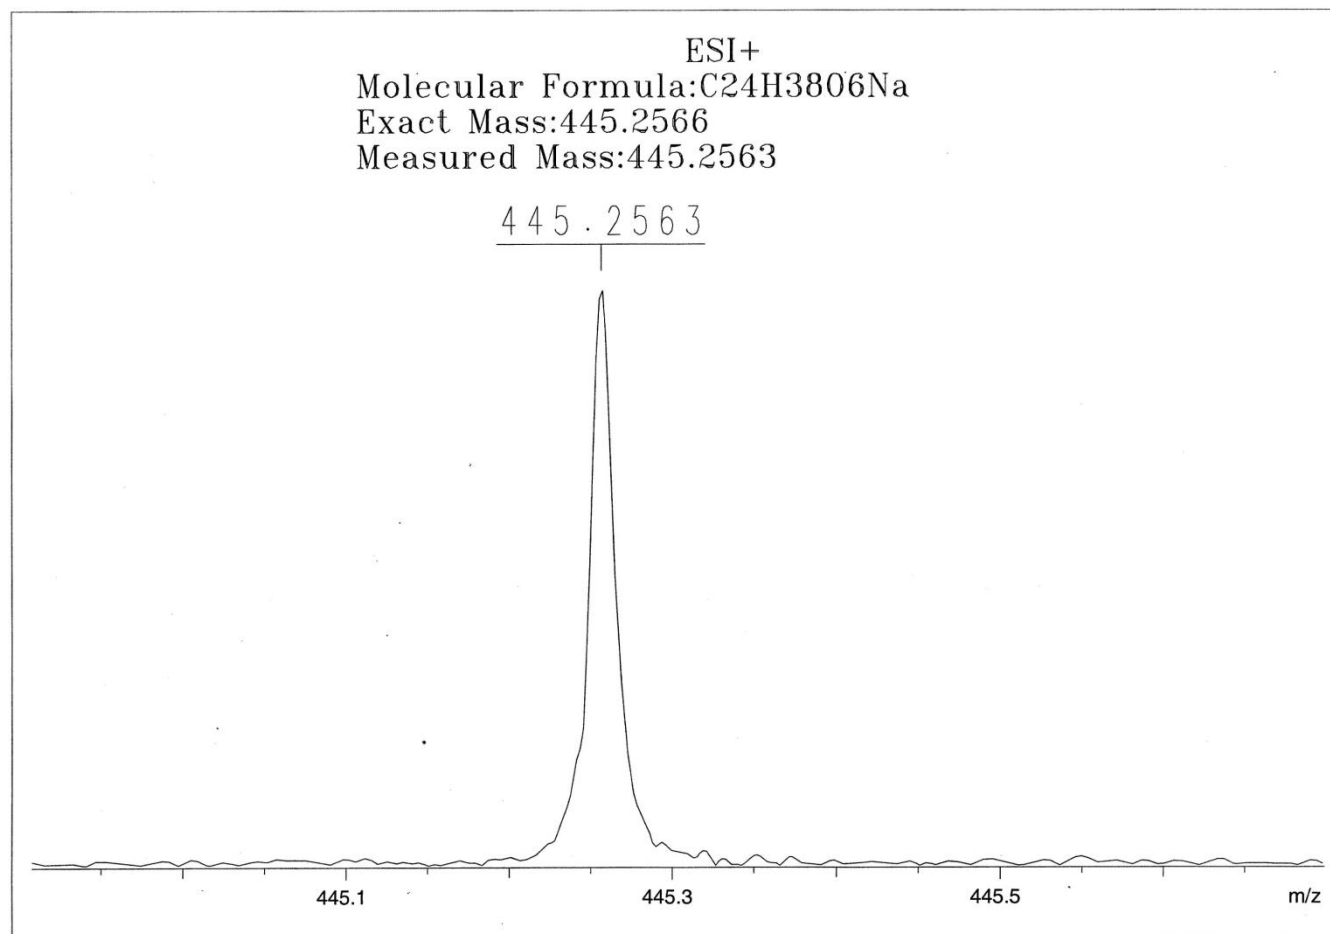

/d=/Data/yl/fj18265962/1/pdata/1 Administrator Wed Jul 13 16:48:10 2011

**Figure S13.**  $^1\text{H}$  NMR spectrum of **5** in  $\text{CDCl}_3$  at 400 MHz.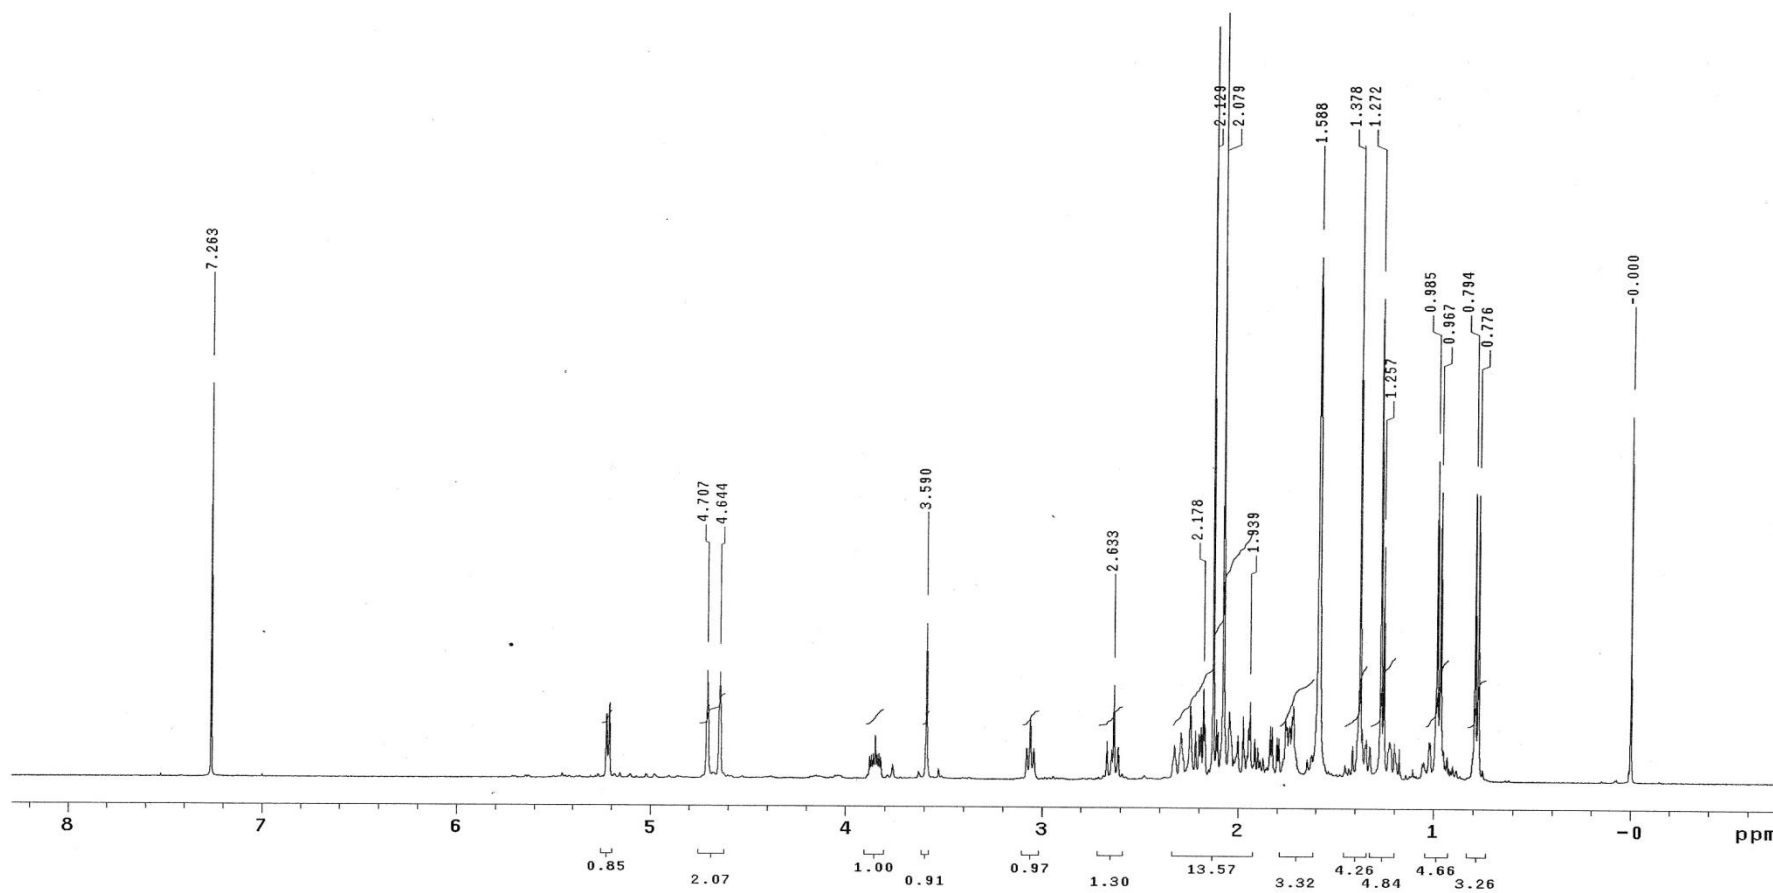

**Figure S14.**  $^{13}\text{C}$  NMR spectrum of **5** in  $\text{CDCl}_3$  at 100 MHz.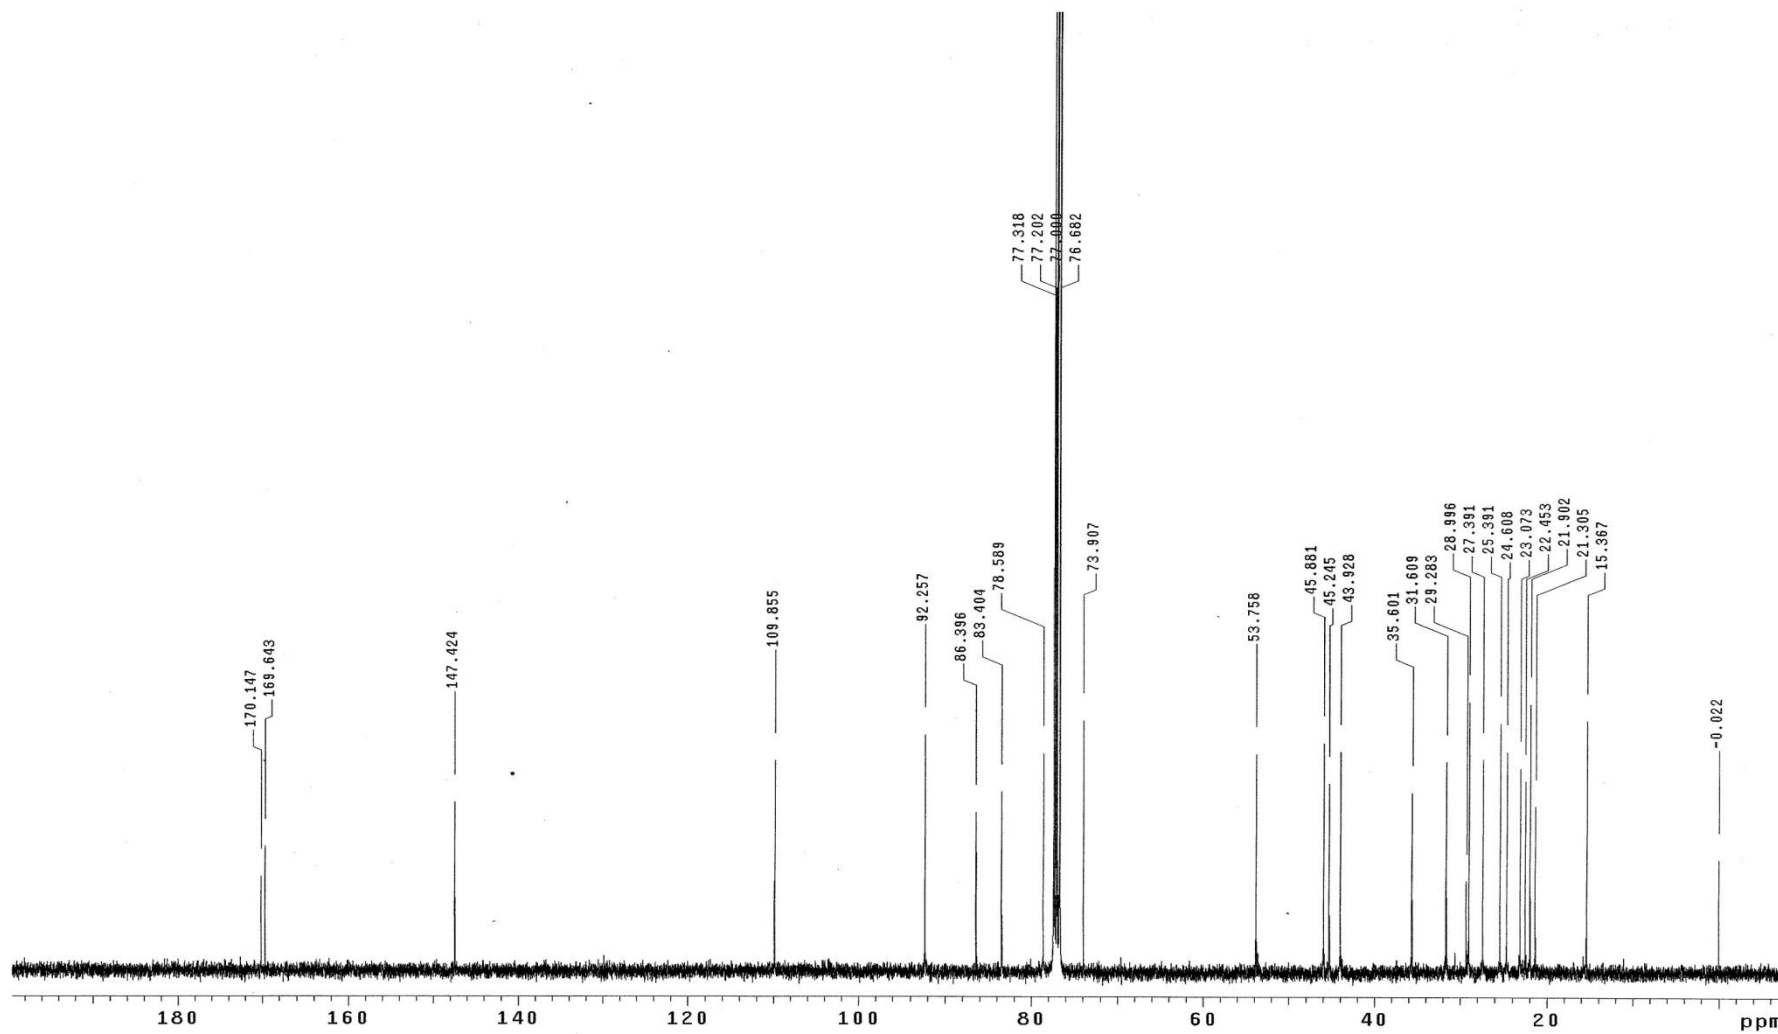

**Figure S15.** HRESIMS spectrum of **5**.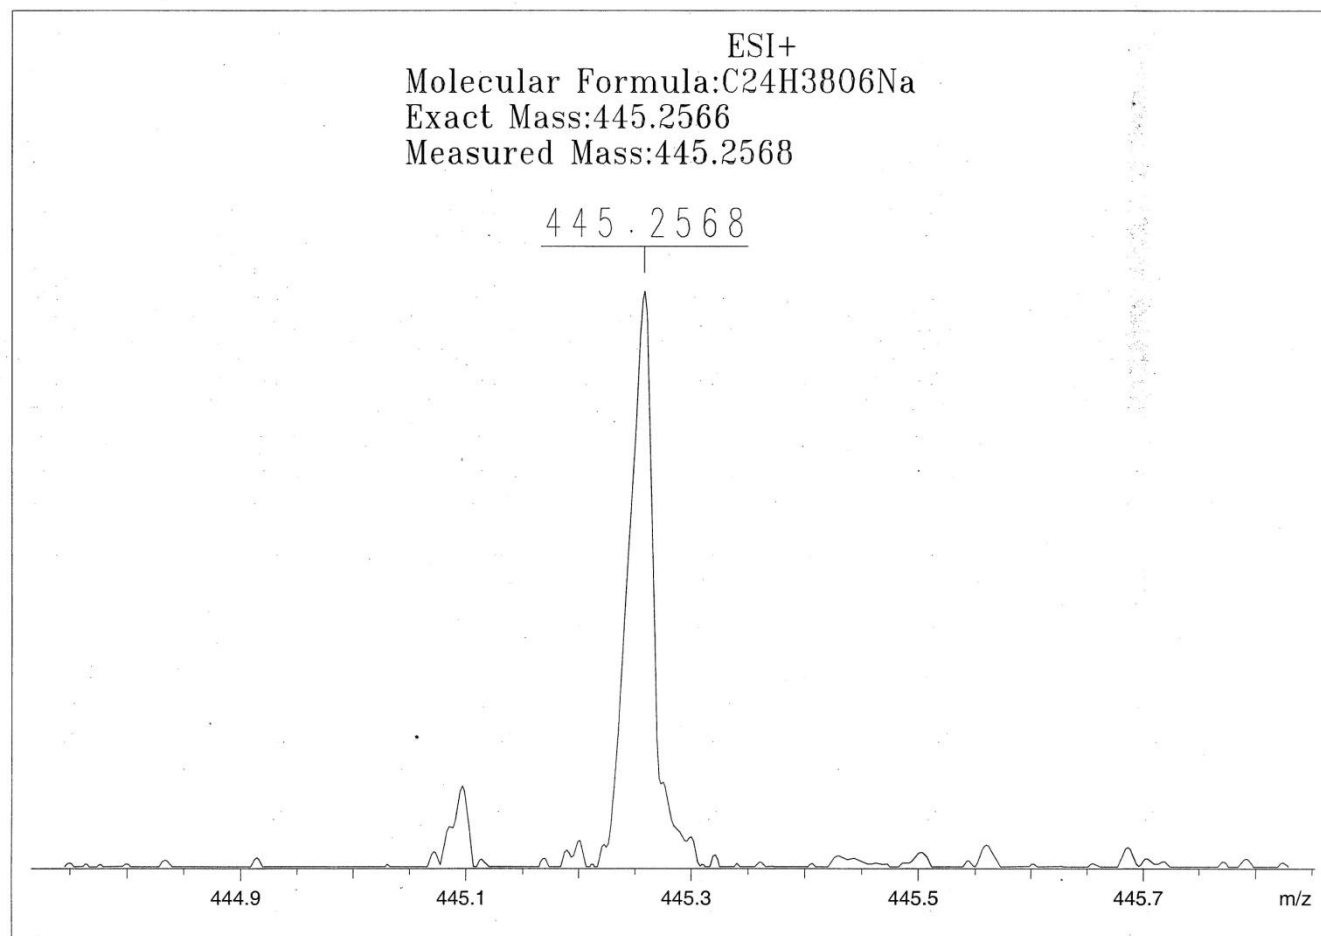

/d=/Data/yy/FJ182671091/1/pdata/1 Administrator Fri Feb 10 14:02:57 2012
